# Supplementary material for: Ultrafast screening of serum for early prediction of diabetes by fractalkine detection
Source: Royal Society of Chemistry journal article supplement (doi:10.1039/d2sd00119e), 2022-01-01
Supplement: d2sd00119e1.pdf [file d2sd00119e1.pdf]

## Supplementary Material

### Ultrafast Screening of Serum for Early Prediction of Diabetes by Fractalkine Detection

Raluca-Ioana Stefan-van Staden<sup>1,\*</sup>, Damaris-Cristina Gheorghe<sup>1</sup>, Roxana-Adriana Stoica<sup>1,2</sup>

<sup>1</sup> Laboratory of Electrochemistry and PATLAB, National Institute of Research for  
Electrochemistry and Condensed Matter, 202 Splaiul Independentei Str., 060021, Bucharest-6,  
Romania

<sup>2</sup> Faculty of General Medicine, “Carol Davila” University of Medicine and Pharmacy Bucharest,  
Romania

The limits of the linear concentration range were determined experimentally. First 3 points, and last 3 points were not on the linear range (Figure S1). Also, all data from the calibration graph were used for the statistic linear regression method in order to find the a, and b terms of the equation  $1/t_{on} = a + b \times \text{Con}_{\text{FKN}}$

While there are many ways of calculating or experimental determination of the limit of quantification, we select to use the one recommended by the latest document provided by IUPAC, found in paragraph 3.36, Note 3<sup>14</sup>.

In this supplementary material, we provide the calibration graph – as obtained using the experimental data (Figure S1)

---

\* Corresponding author: Tel. +40751507779; Fax +4021 3163113; e-mail: [ralucavanstaden@gmail.com](mailto:ralucavanstaden@gmail.com)

# Supplementary Material

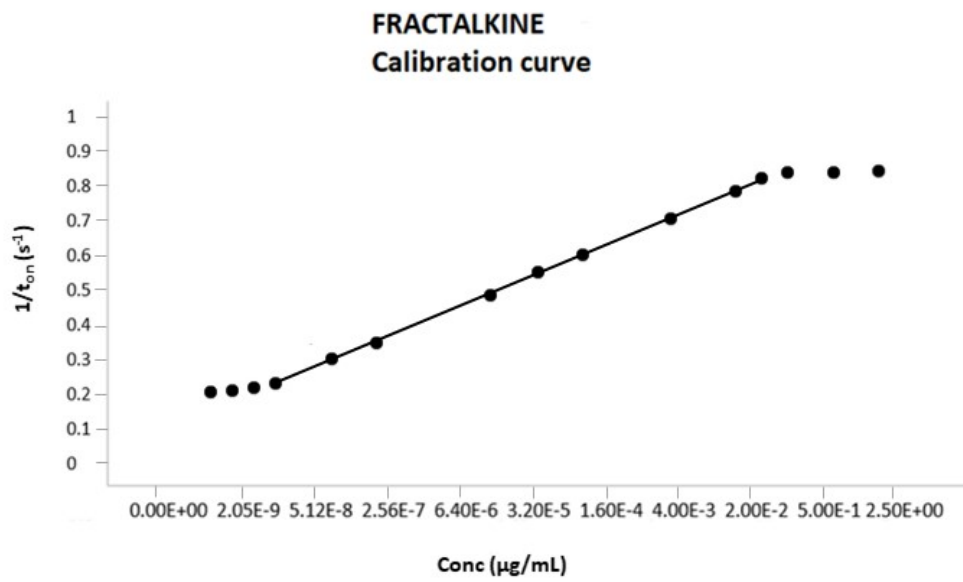

Figure S1 Calibration curve of FKN.
